# Supplementary material for: Binder-free layered Ti3C2/CNTs nanocomposite anodes with enhanced capacity and long-cycle life for lithium-ion batteries
Source: Royal Society of Chemistry journal article supplement (doi:10.1039/c4dt02058h), 2015-01-01
Supplement: c4dt02058h1.pdf [file c4dt02058h1.pdf]

## **Binder-free layered $\text{Ti}_3\text{C}_2/\text{CNTs}$ nanocomposite anodes with enhanced capacity and long-cycle life for lithium-ion batteries**

Yu Liu,<sup>a</sup> Wei Wang,<sup>b</sup> Yulong Ying,<sup>a</sup> Yewu Wang,<sup>b</sup> Xinsheng Peng,<sup>\*ac</sup>

<sup>a</sup> State Key Laboratory of Silicon Materials, Department of Materials Science and Engineering, Zhejiang University, China.

<sup>b</sup> Department of Physics, Zhejiang University, Hangzhou, 310027, P. R. China.

<sup>c</sup> Cyrus Tang Center for Sensor Materials and Applications, Zhejiang University, Hangzhou 310027, China. Fax: 86-571-87952625; Tel: 86-571-87951958

E-mail: [pengxinsheng@zju.edu.cn](mailto:pengxinsheng@zju.edu.cn)

### **1. Experimental Section**

**Synthesis of  $\text{Ti}_3\text{C}_2$  nanosheets:**  $\text{Ti}_3\text{C}_2$  nanosheets were synthesized as described by Gogotsi's group previously.<sup>1</sup> Briefly, 2.0 g  $\text{Ti}_3\text{AlC}_2$  powders (Beijing Jinhezhi Materials Co., Ltd. >98 wt.% purity) were dispersed in 20 mL 25% hydrofluoric acid (Sinopharm Chemical Reagent Co., Ltd.) under stirring for 10 hours. Then the suspensions were washed several times using ultrapure water until the pH of the liquid reached 5. The obtained sample was collected and dried in air. Next, 0.5 g obtained  $\text{Ti}_3\text{C}_2$  powder was dispersed in 25 mL of dimethyl sulfoxide (DMSO) under stirring at room temperature for 20 h. Then the intercalated powder was collected by centrifugation from the colloidal suspension. The purified powder was redispersed in 250 mL ultrapure water under the ultrasonication for 1 hour and centrifuged with 3500 rpm. At last, the upper solution has a concentration of around 0.6 mg/mL was obtained.

**Synthesis of layered  $\text{Ti}_3\text{C}_2/\text{CNTs}$  nanocomposite:** Oxidized water-soluble CNTs with a concentration of 0.2 mg/mL were prepared as presented previously.<sup>2</sup> A certain amount of  $\text{Ti}_3\text{C}_2$  suspension and 15 mL CNTs dispersion was mixed together and sonicated for 1 h. Subsequently,  $\text{Ti}_3\text{C}_2/\text{CNTs}$  lamellar films were prepared by filtering the mixed suspension on a polycarbonate (PC) membrane with 200 nm pores (Millipore). The route of preparation of  $\text{Ti}_3\text{C}_2/\text{CNTs}$  paper is demonstrated in Scheme 1. Three samples with mass ratios of  $\text{Ti}_3\text{C}_2$  to CNTs of 1:1 (6 mg), 2:1 (9 mg), 1:2 (4.5 mg), and pure  $\text{Ti}_3\text{C}_2$  paper were synthesized for comparison.

**Electrode preparation:** Pure  $\text{Ti}_3\text{C}_2$  and  $\text{Ti}_3\text{C}_2/\text{CNTs}$  hybrid lamellar paper were directly used as electrodes, respectively, and incorporated into a coin-type cell with lithium foils as both counter and reference. The electrolyte employed in the cell was 1M LiPF<sub>6</sub> in a 50:50 (w/w) mixture of ethylene carbonate and diethyl carbonate. The galvanostatic (GV) charge-discharge performances of the cell were tested in the voltage range of 0.05-3.0 V under a constant current density of 0.5 C by EQ-BST8-WA battery-test system, cyclic voltammetry (CV) was recorded by a CHI 660D electrochemical workstation in the voltage range 0.05-3.0 V with a scan rate of 0.1 mV s<sup>-1</sup>. Electrochemical impedance spectroscopy (EIS) results were obtained from a frequency range of 100 kHz to 1 Hz.

**Characterization:** The phase of the composite is obtained by X-ray diffraction (XRD) at room temperature using an X'Pert PRO (PANalytical, Netherlands) instrument with Cu  $K\alpha$  radiation. The morphologies were characterized using scanning electronic microscopy (SEM) (Hitachi S-4800), transmission electron

microscopy (TEM, Philips CM200).

## 2. Cross-section SEM images of the $\text{Ti}_3\text{C}_2/\text{CNTs}$ paper with corresponding energy-dispersive X-ray spectroscopy (EDS) maps for C and Ti.

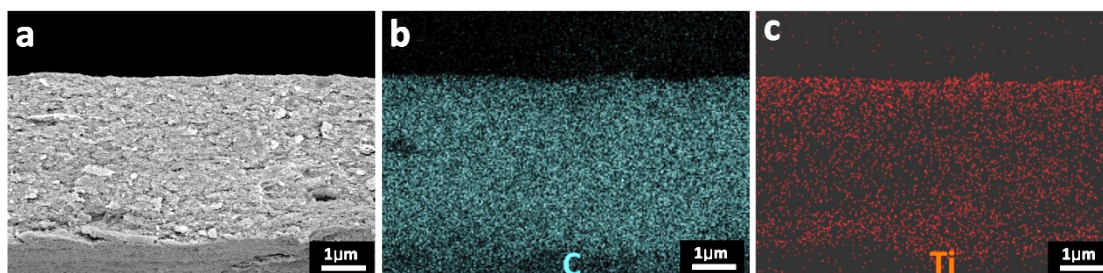

**Fig. S1** (a) Cross-section SEM images of the  $\text{Ti}_3\text{C}_2/\text{CNTs}$  paper with corresponding energy-dispersive X-ray spectroscopy (EDS) maps for C (b) and Ti (c).

## 3. Morphology of delaminated $\text{Ti}_3\text{C}_2$ nanosheets

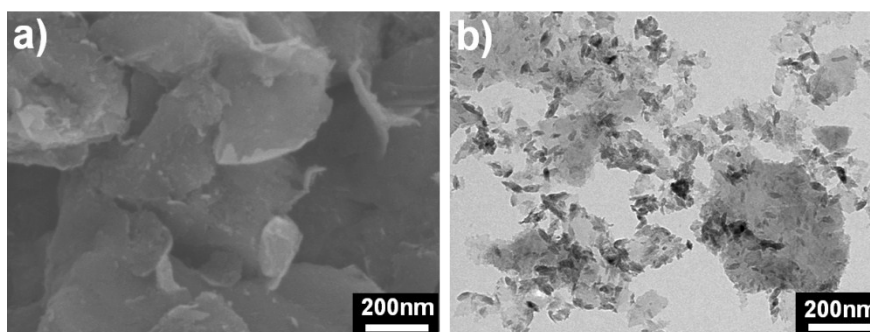

**Fig. S2** SEM and TEM images of delaminated  $\text{Ti}_3\text{C}_2$  nanosheets

4. Cycling performance of  $\text{Ti}_3\text{C}_2/\text{CNTs}$  composites with different mass ratios of  $\text{Ti}_3\text{C}_2$  to CNTs at 1 C

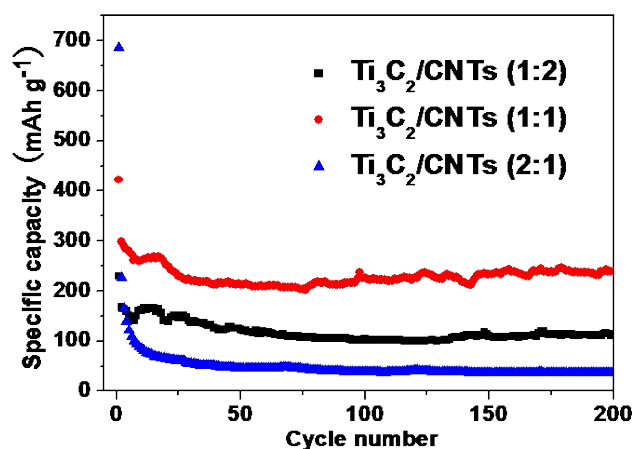

Fig. S3 Cycling performance of  $\text{Ti}_3\text{C}_2/\text{CNTs}$  composites with different mass ratios of  $\text{Ti}_3\text{C}_2$  to CNTs at 1 C.

5. Surface area of  $\text{Ti}_3\text{C}_2$ ,  $\text{Ti}_3\text{C}_2/\text{CNTs}$  composites and CNTs.

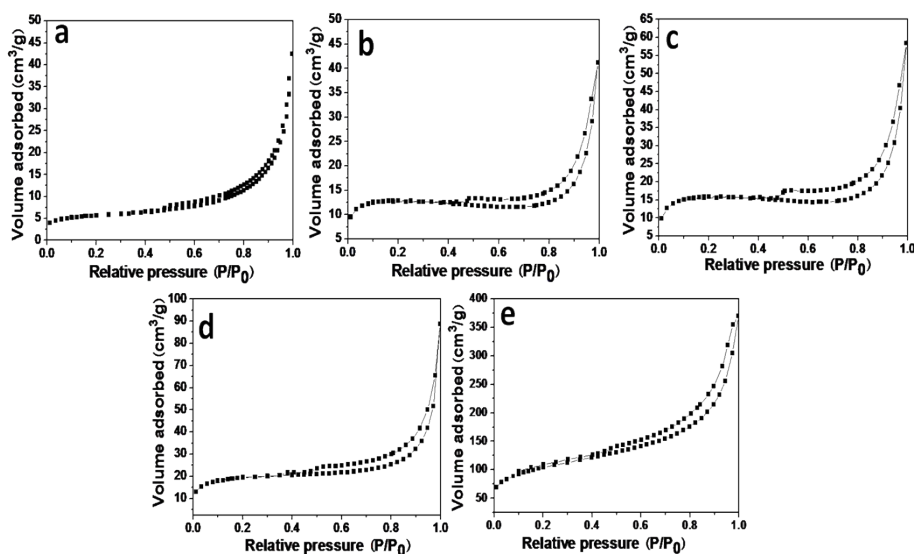

Fig. S4 (a) Nitrogen adsorption and desorption isotherms of  $\text{Ti}_3\text{C}_2$ ,  $\text{Ti}_3\text{C}_2/\text{CNTs}$  (2:1),  $\text{Ti}_3\text{C}_2/\text{CNTs}$  (1:1),  $\text{Ti}_3\text{C}_2/\text{CNTs}$  (1:2) and CNTs.

The surface area of  $\text{Ti}_3\text{C}_2$ ,  $\text{Ti}_3\text{C}_2/\text{CNTs}$  (2:1),  $\text{Ti}_3\text{C}_2/\text{CNTs}$  (1:1),  $\text{Ti}_3\text{C}_2/\text{CNTs}$  (1:2) and CNTs were 20, 46, 74, 97 and  $366 \text{ m}^2 \text{ g}^{-1}$ , respectively.

## References

- 1 M. R. Lukatskaya, O. Mashtalir, C. E. Ren, Y. Dall'Agnese, P. Rozier, P. L. Taberna, M. Naguib, P. Simon, M. W. Barsoum, Y. Gogotsi, *Science*, 2013, **341**, 1502-1505.
- 2 Y. Liu, H. W. Huang, X. S. Peng, *Electrochim. Acta*, 2013, **104**, 289-294.
